# Supplementary material
Source: PubMed Central journal article supplement (PMC5278704)
Supplement: AAC.01869-16_zac002175905s1.pdf [file AAC.01869-16_zac002175905s1.pdf]

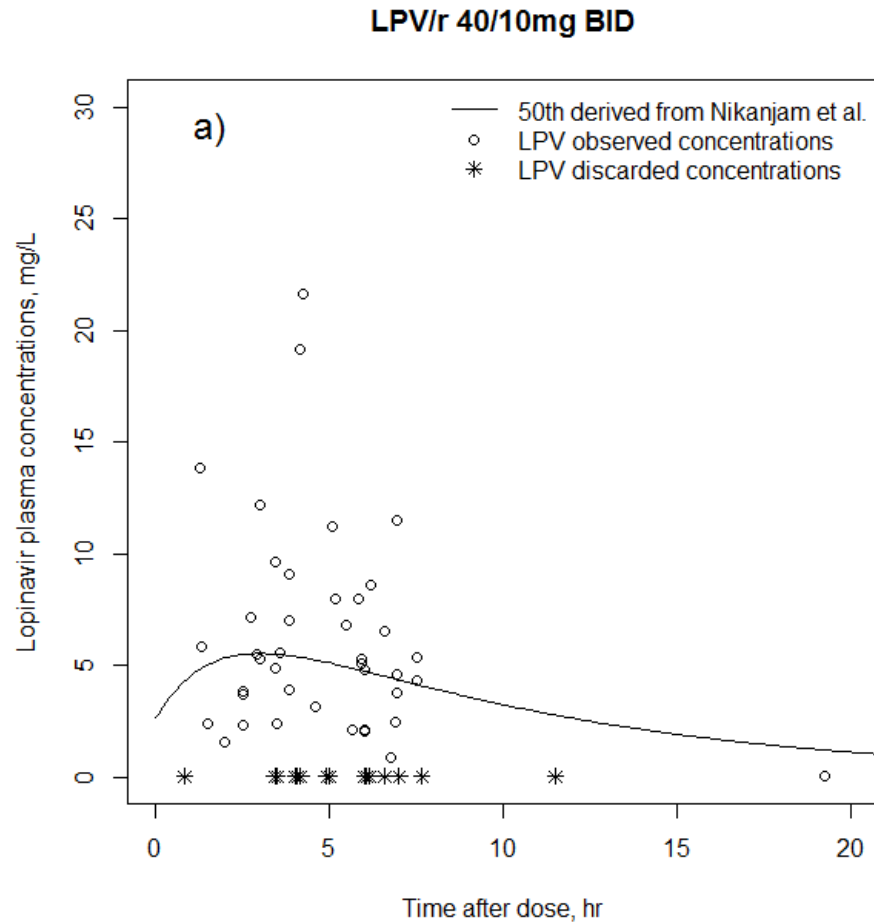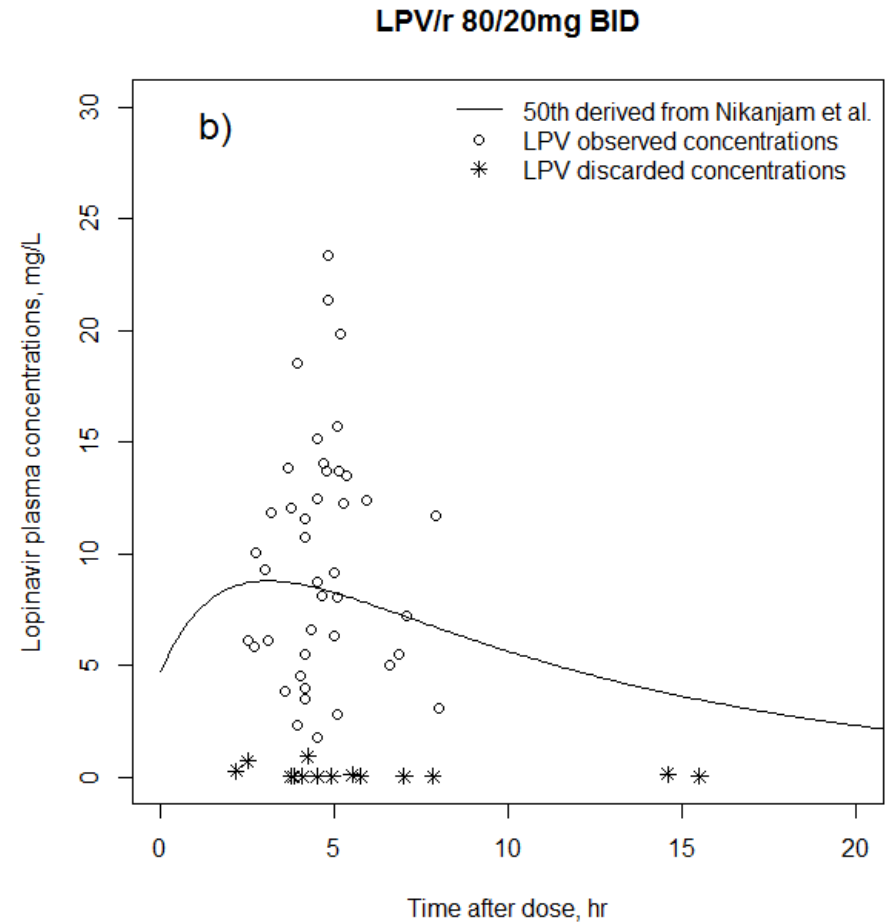

**Fig. S1** Observed lopinavir concentrations (○) and individual median predictions (curve) obtained from Nikanjam et al., as a function of time. Asterisks represent the observations discarded from the pharmacokinetic analysis. Fig.S1a and Fig.S1b display the data obtained respectively for a 40/10mg or a 80/20mg LPV/r BID dose.

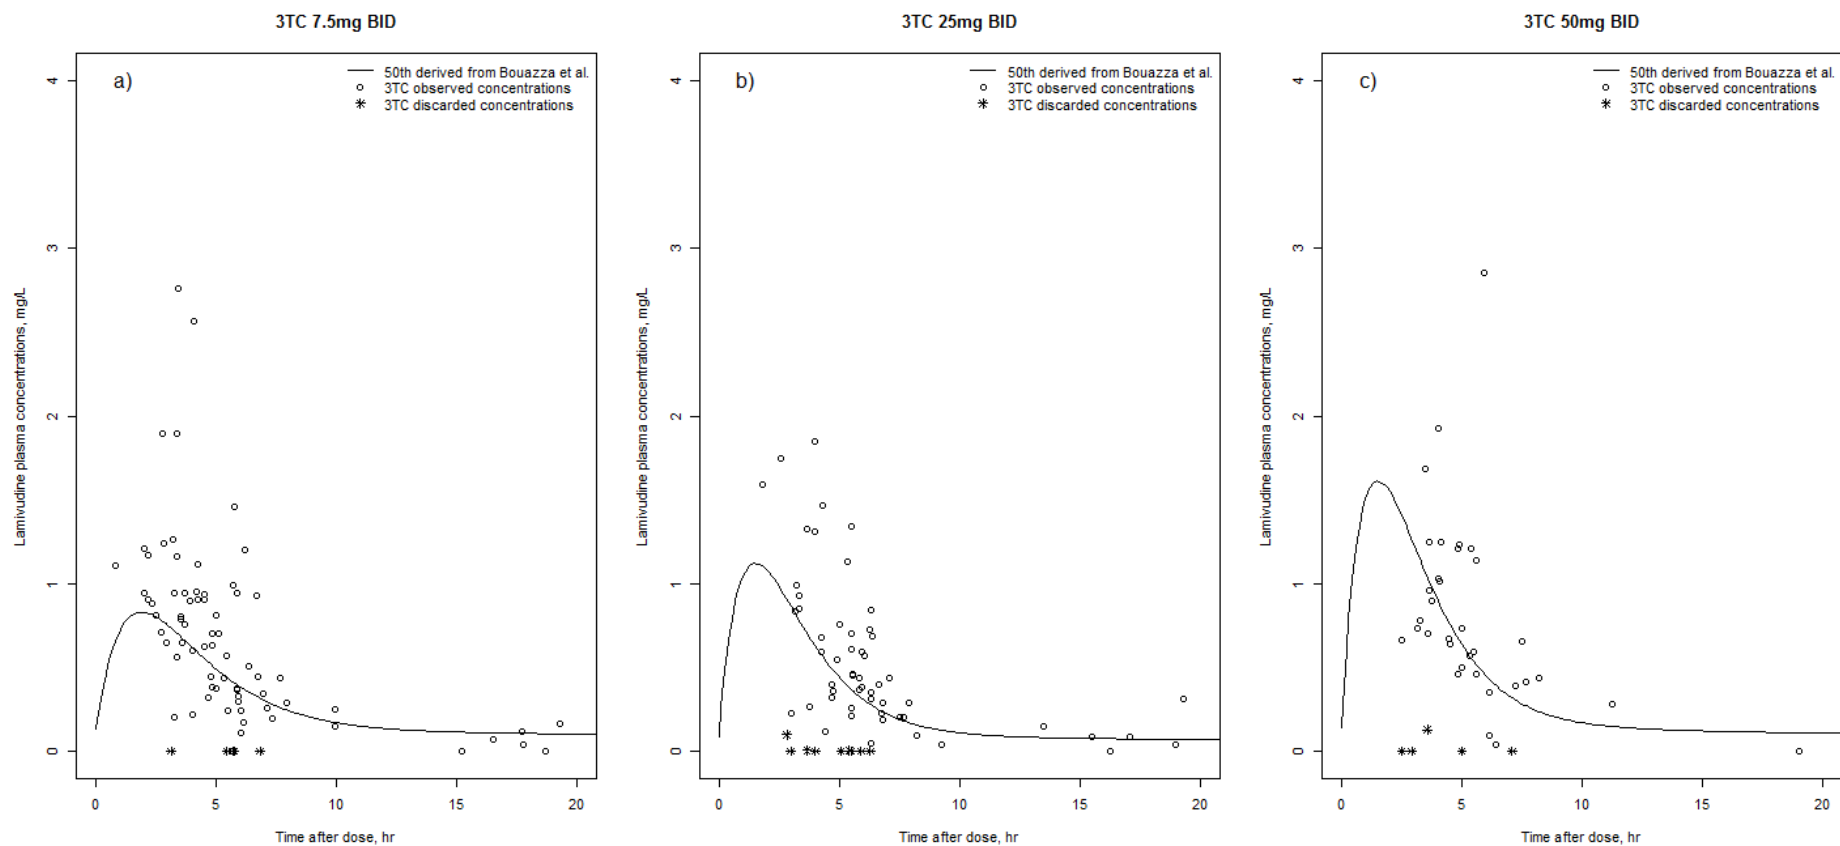

**Fig. S2** Observed lamivudine concentrations (○) and individual median predictions (curve) obtained from Bouazza *et al.*, as a function of time. Asterisks represent the observations discarded from the pharmacokinetic analysis. Fig.S2a, Fig.S2b and FIG.S2c display the data obtained respectively for a 7.5mg, a 25mg or a 50mg 3TC BID dose.
